# Supplementary material for: Measuring rainfall using microwave links: the influence of temporal sampling
Source: Copernicus journal article supplement (doi:10.5194/amt-17-2811-2024), 2024-05-08
Supplement: Supplementary file 1 [file amt-17-2811-2024-supplement.pdf]

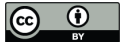

*Supplement of*

## **Measuring rainfall using microwave links: the influence of temporal sampling**

**Luuk D. van der Valk et al.**

*Correspondence to:* Luuk D. van der Valk ([l.d.vandervalk@tudelft.nl](mailto:l.d.vandervalk@tudelft.nl))

The copyright of individual parts of the supplement might differ from the article licence.

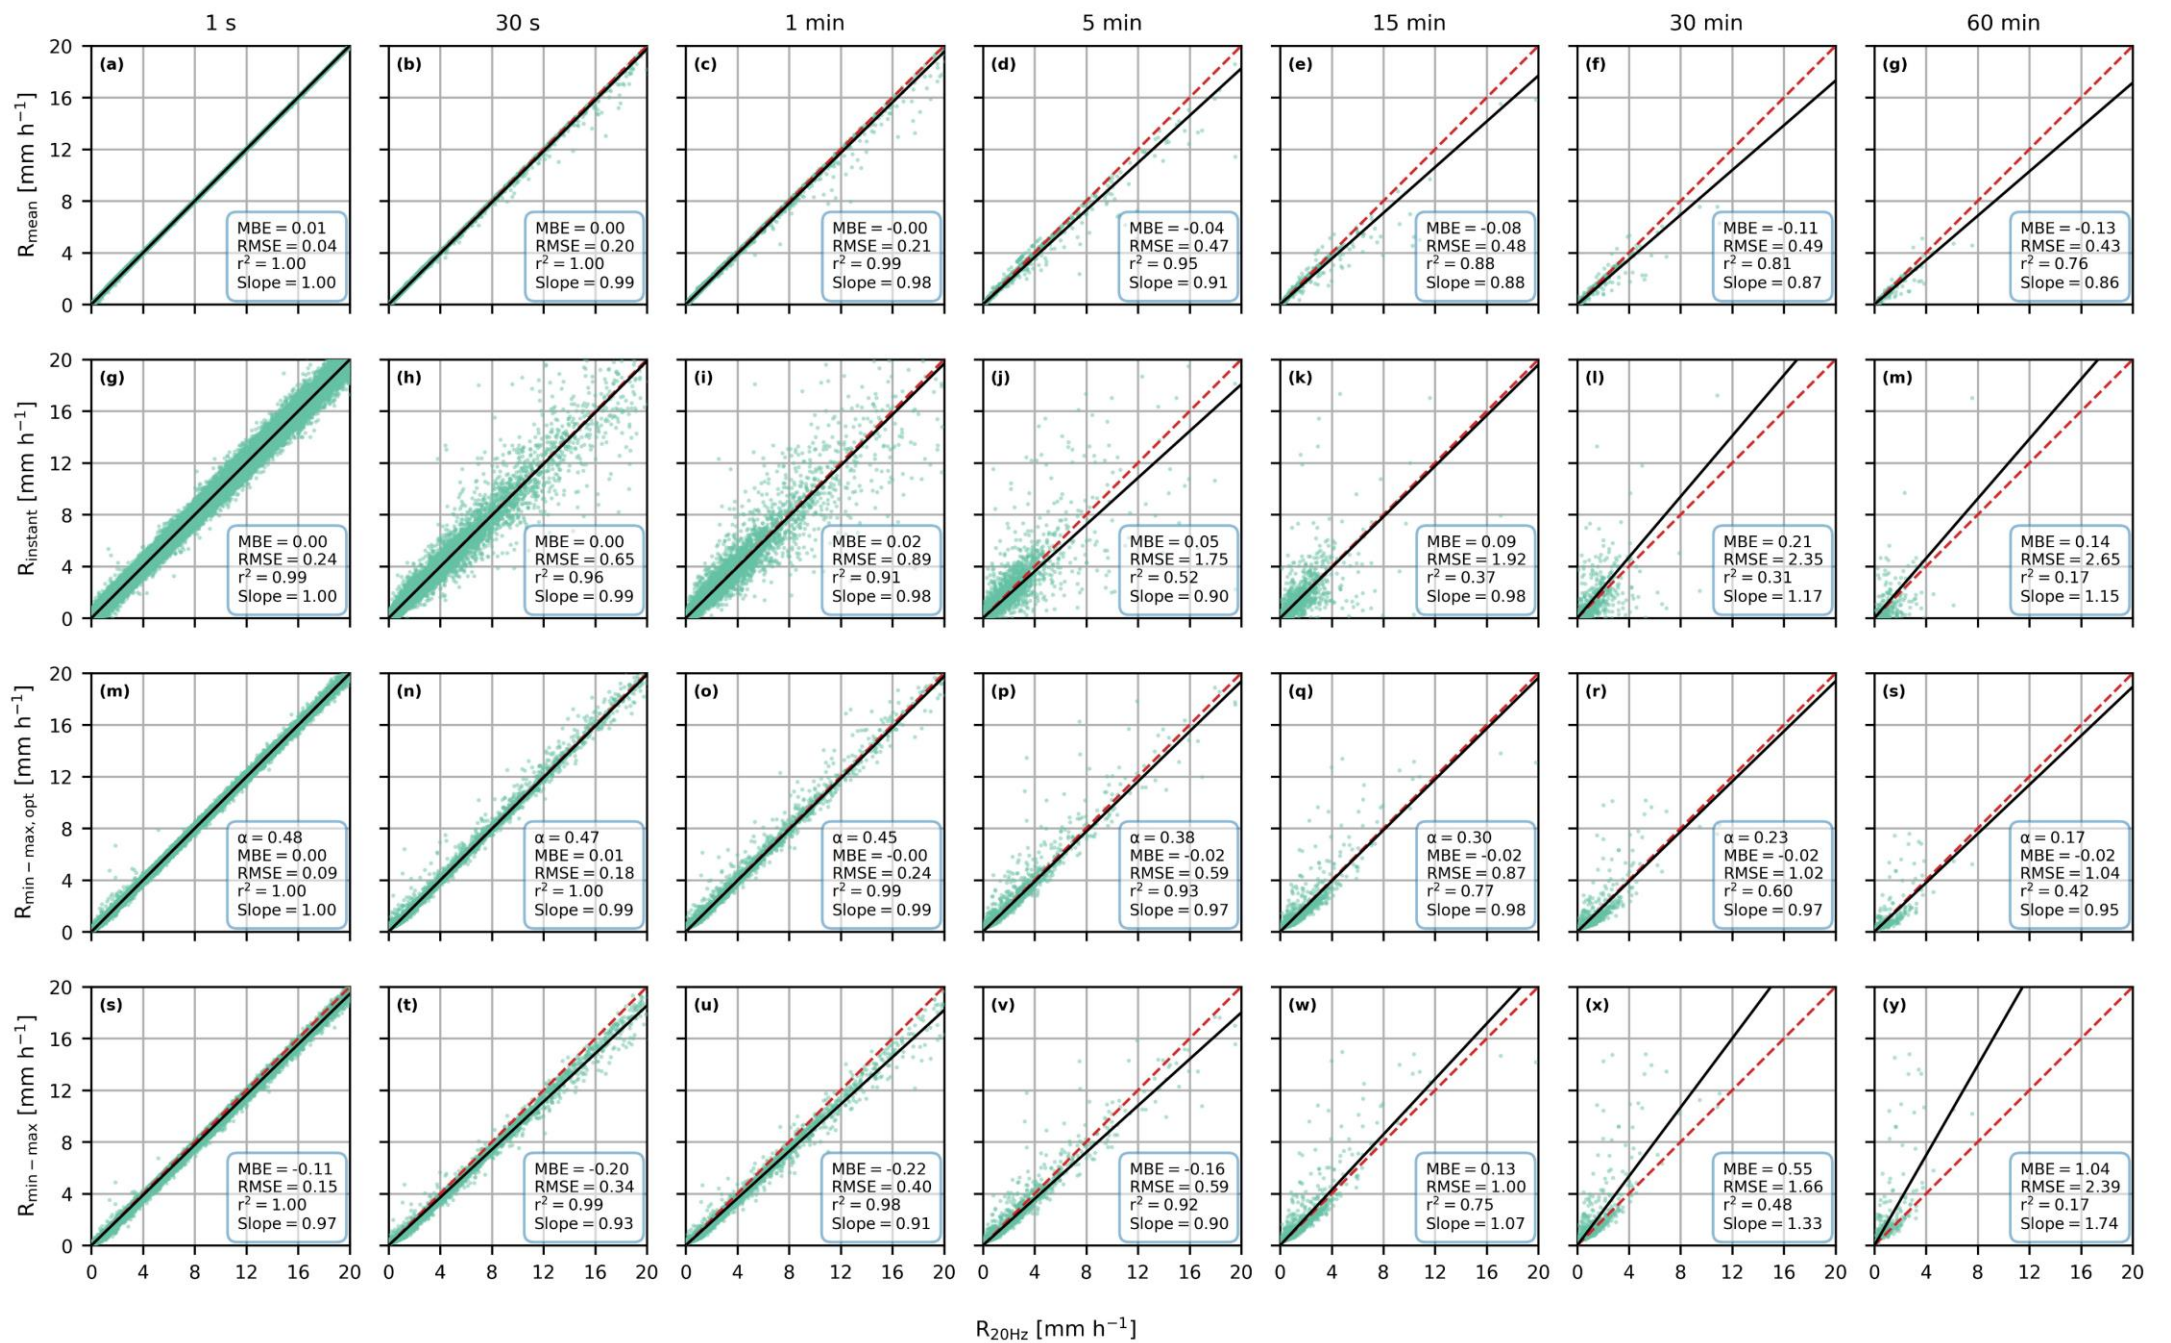

**Figure S1.** Comparison of rainfall intensities derived for the various time intervals (columns) and methods (rows) versus time-averaged rainfall intensities computed with the 20 Hz data for the Nokia Flexihopper microwave link. Optimization of  $\alpha$  is similar as in Overeem et al. (2011). The red dashed line is the 1:1 line and the black line represents the linear regression line.

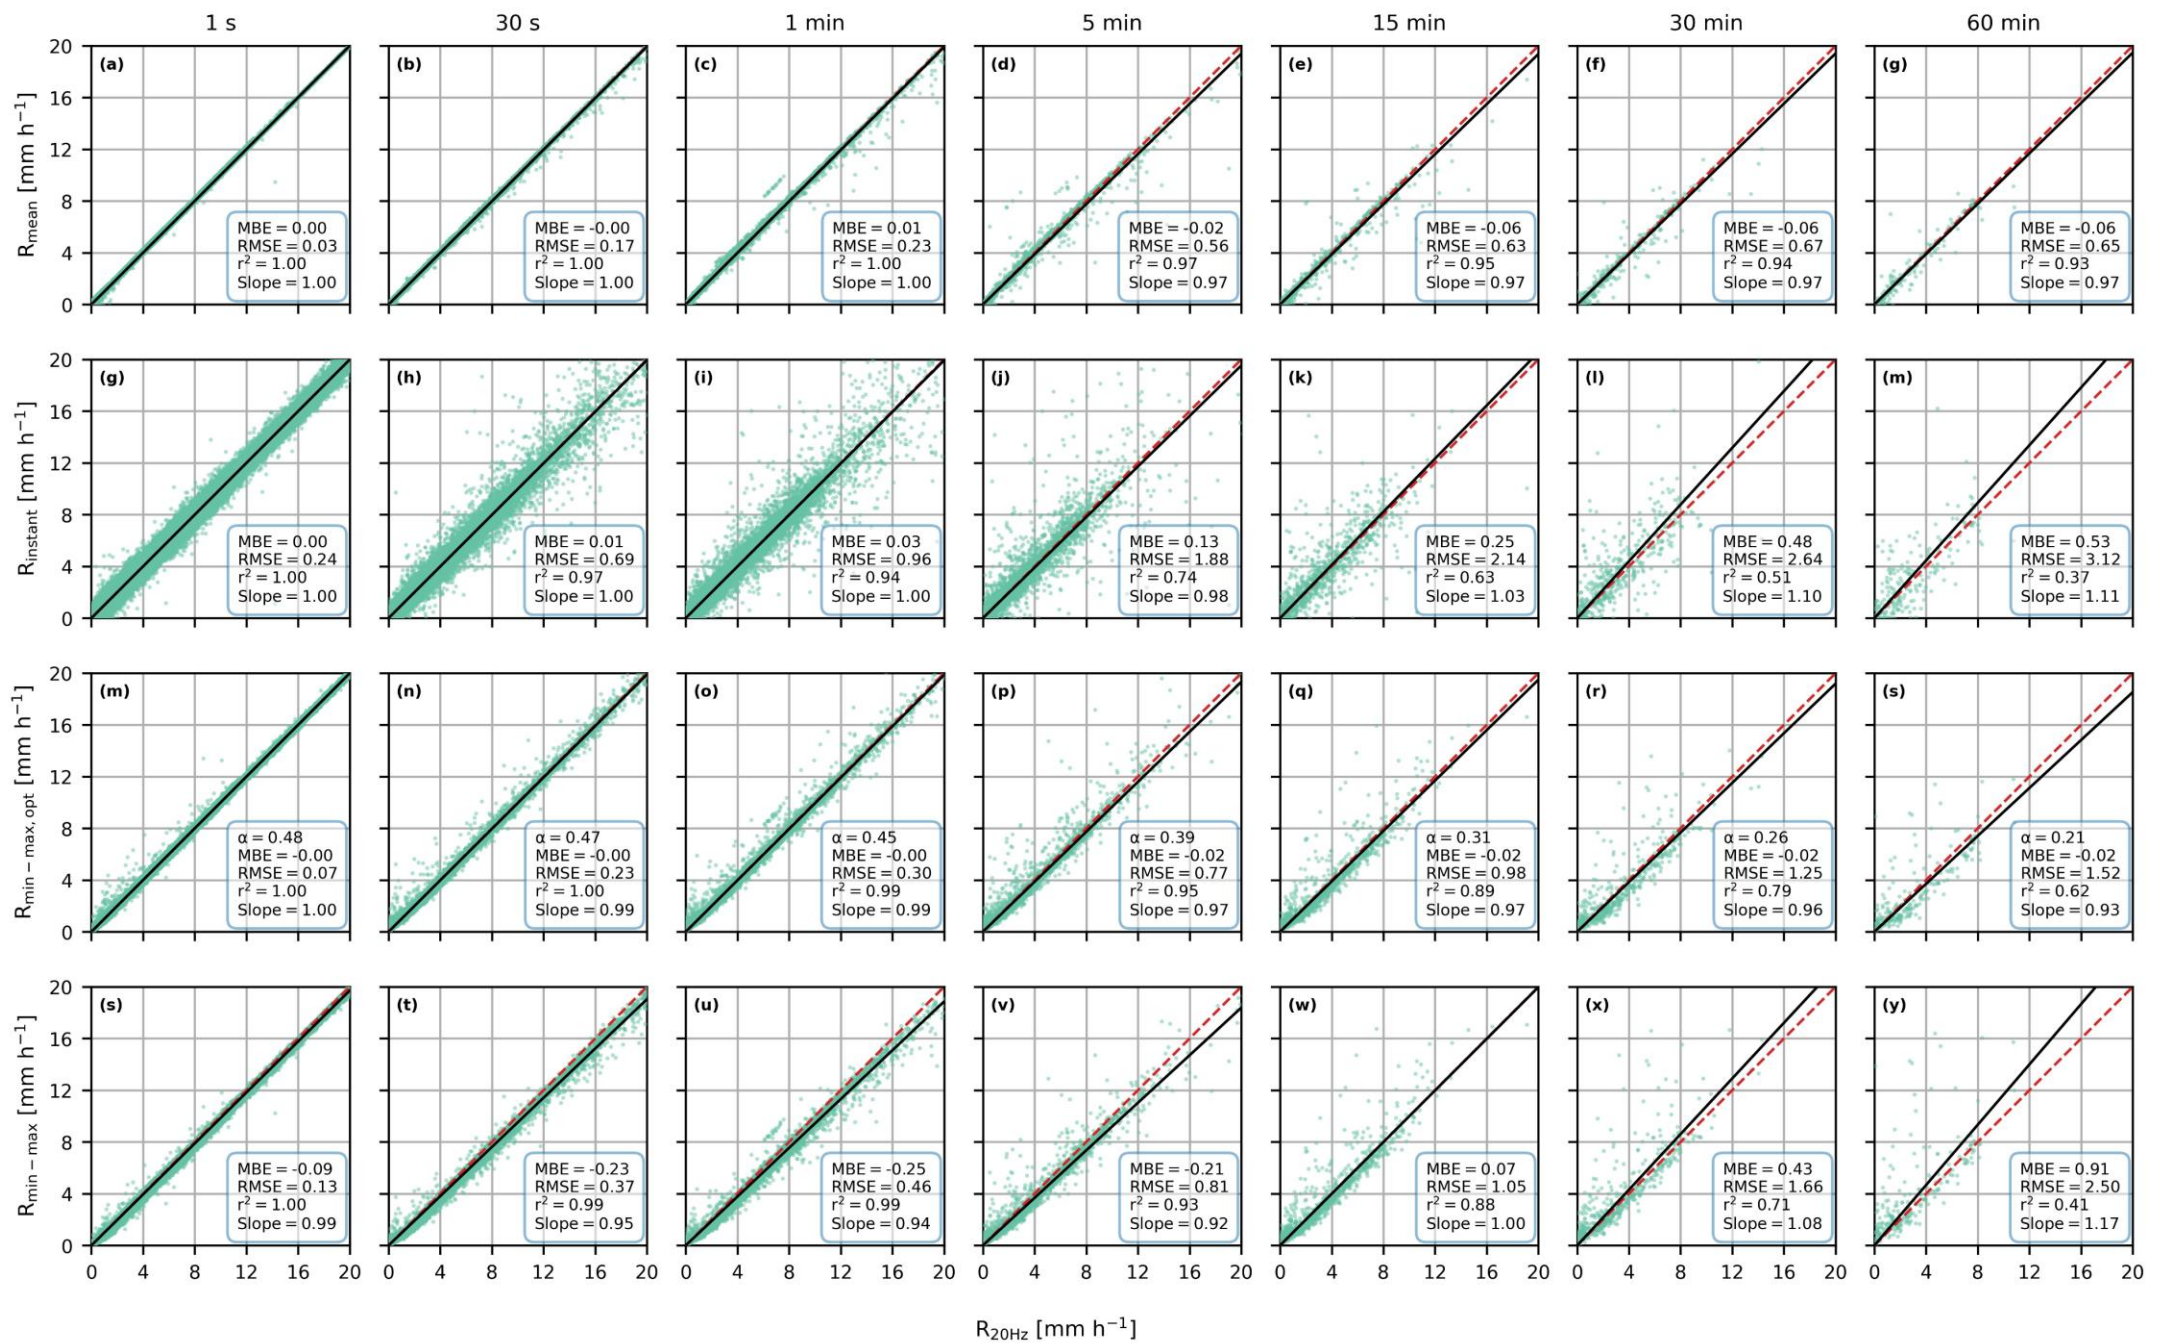

**Figure S2.** Comparison of rainfall intensities derived for the various time intervals (columns) and methods (rows) versus time-averaged rainfall intensities computed with the 20 Hz data for the RAL 38 GHz horizontally polarized microwave link. Optimization of  $\alpha$  is similar as in Overeem et al. (2011). The red dashed line is the 1:1 line and the black line represents the linear regression line.



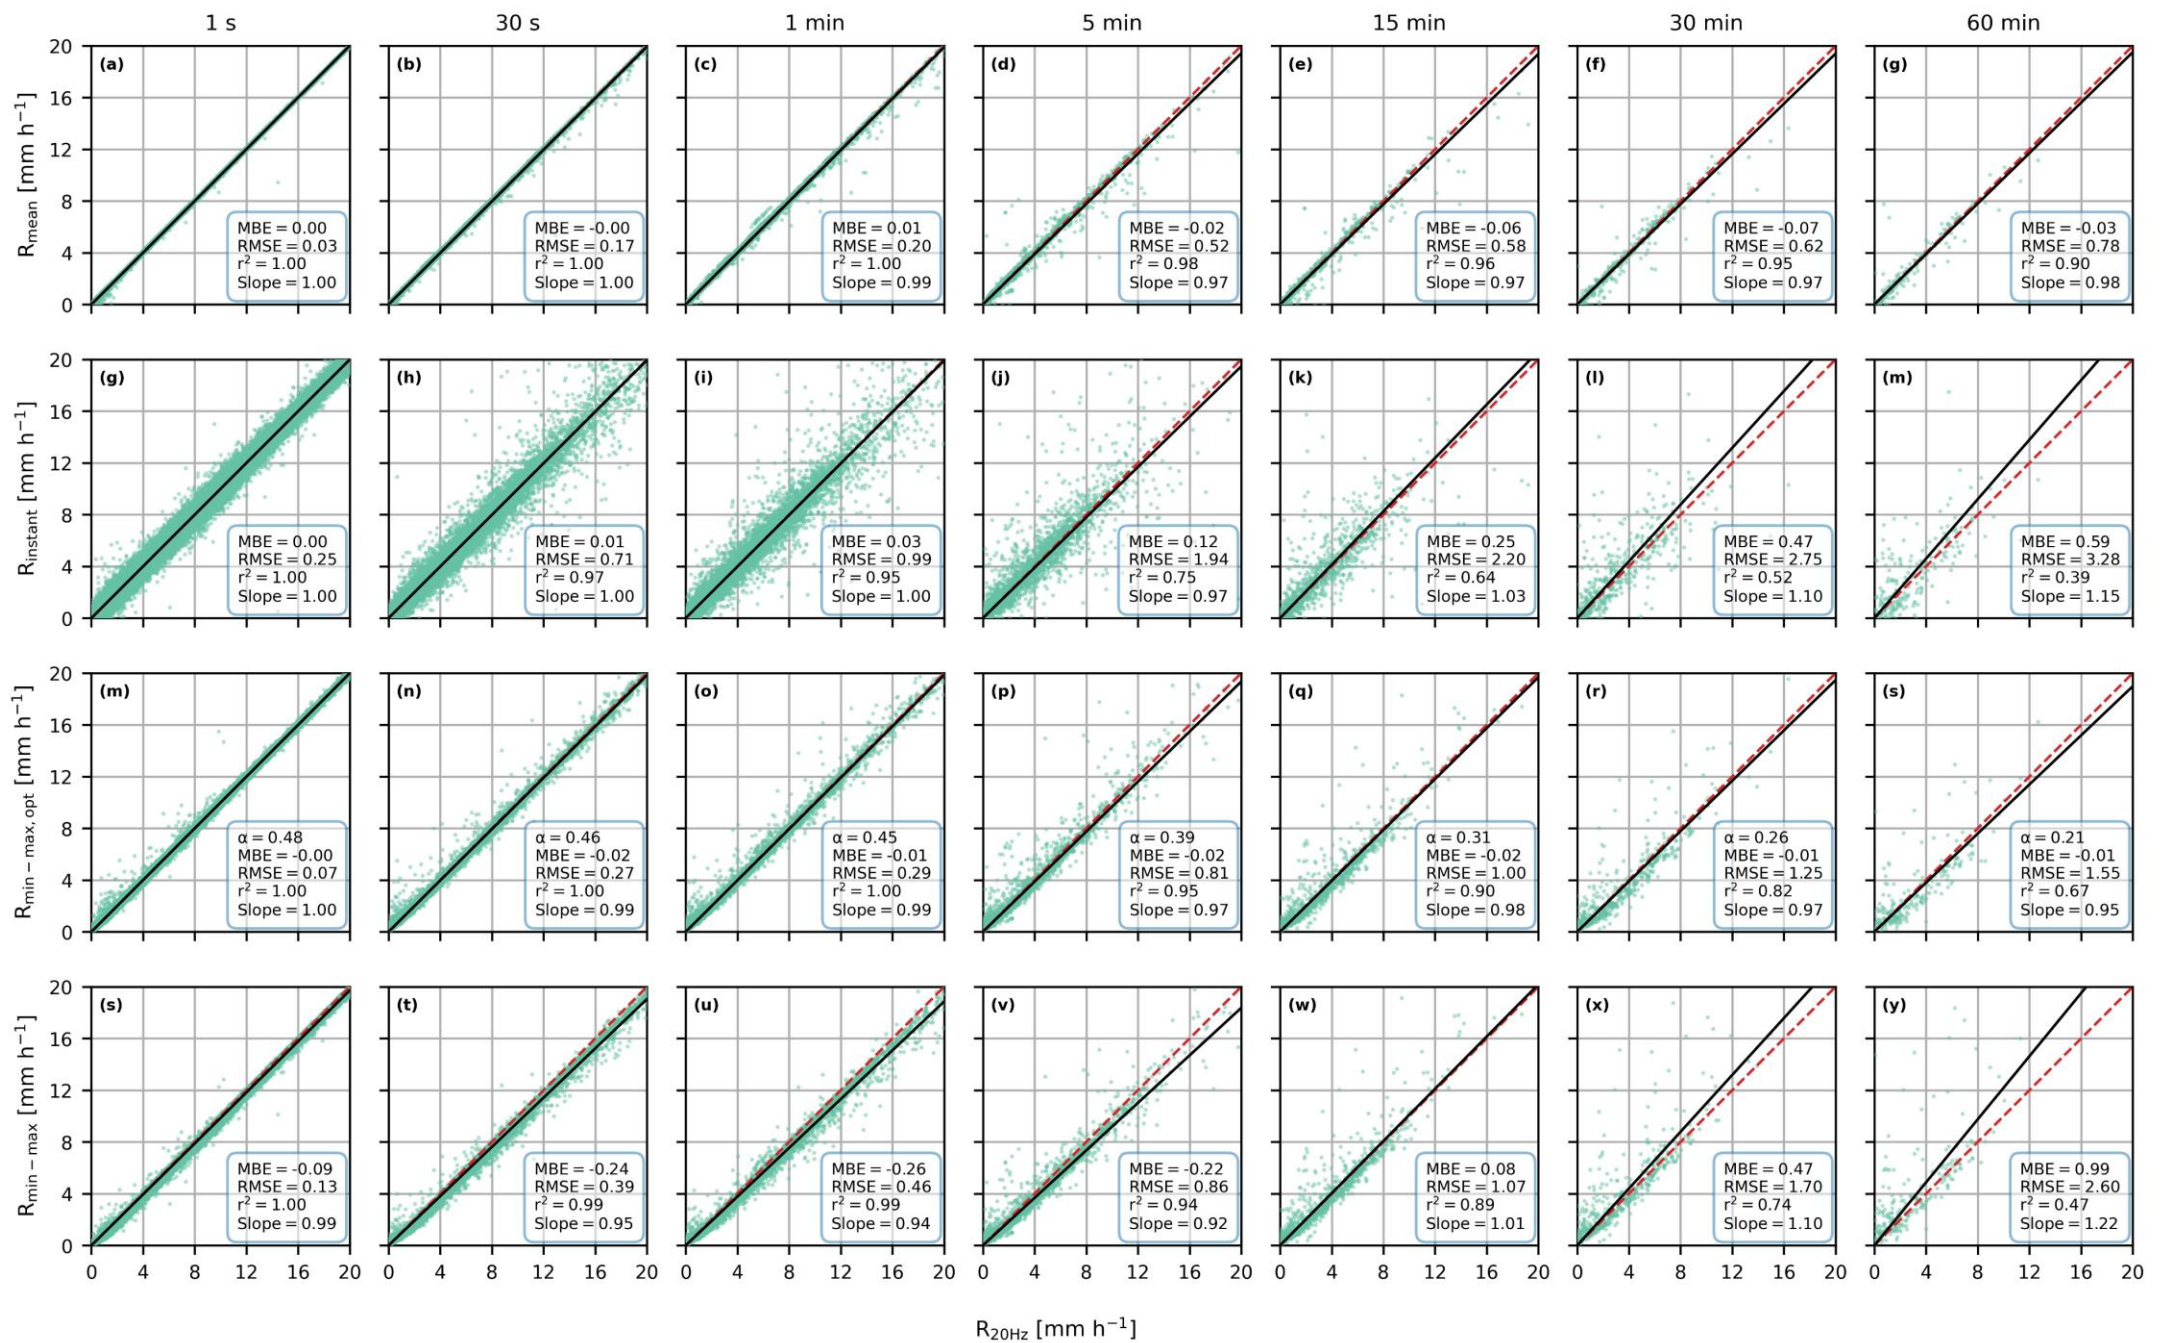

**Figure S3.** Comparison of rainfall intensities derived for the various time intervals (columns) and methods (rows) versus time-averaged rainfall intensities computed with the 20 Hz data for the RAL 38 GHz vertically polarized microwave link. Optimization of  $\alpha$  is similar as in Overeem et al. (2011). The red dashed line is the 1:1 line and the black line represents the linear regression line.

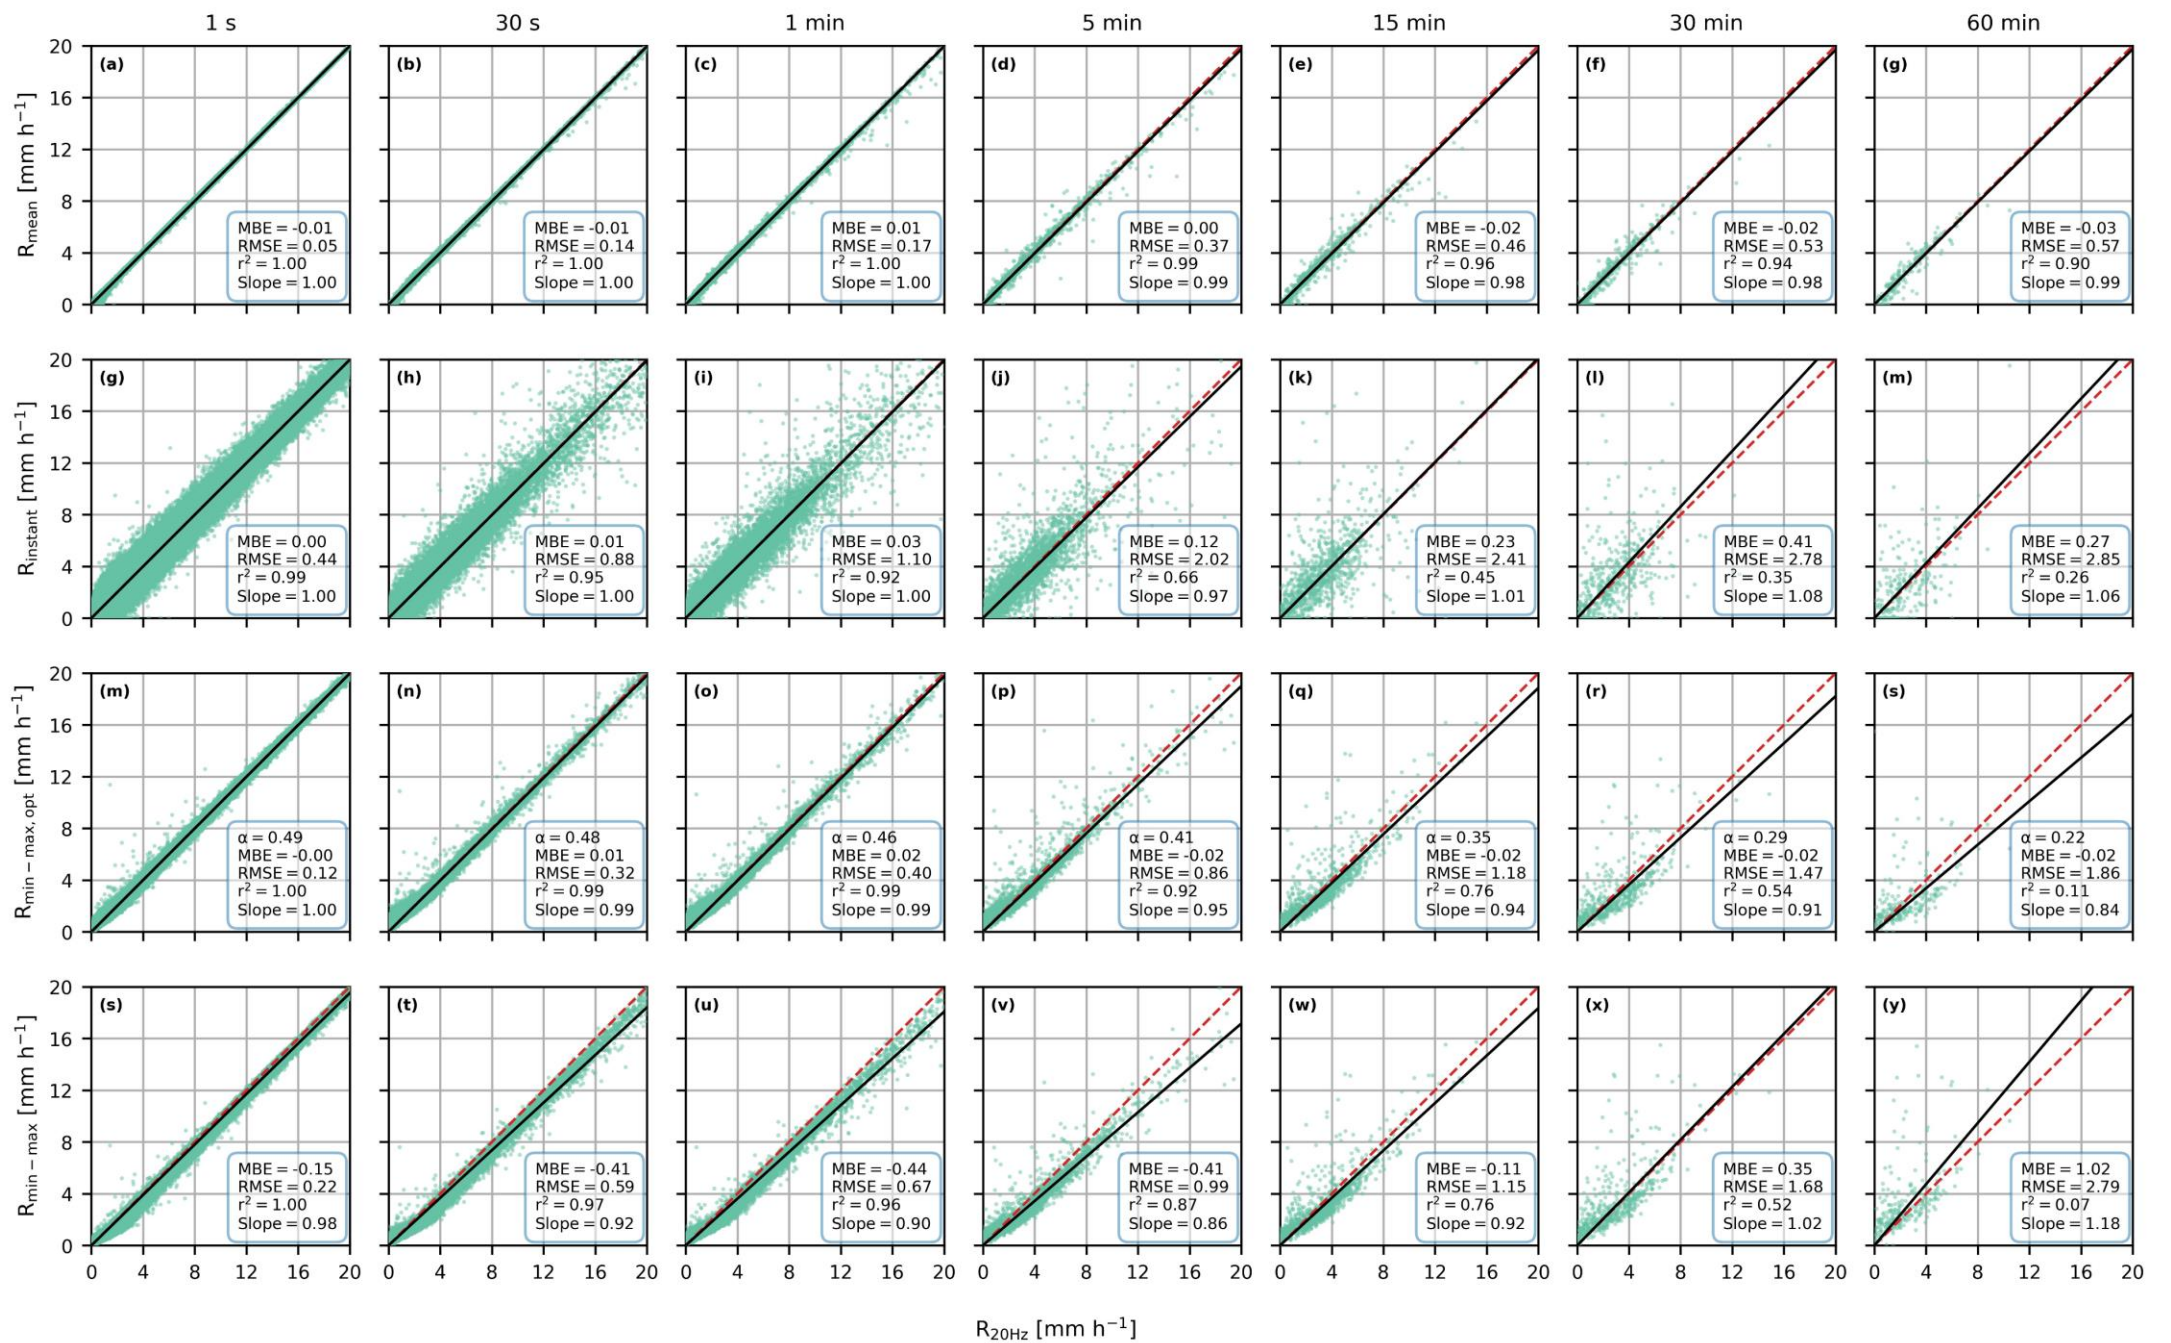

**Figure S4.** Comparison of rainfall intensities derived for the various time intervals (columns) and methods (rows) versus time-averaged rainfall intensities computed with the 20 Hz data for the RAL 26 GHz horizontally polarized microwave link. Optimization of  $\alpha$  is similar as in Overeem et al. (2011). The red dashed line is the 1:1 line and the black line represents the linear regression line.



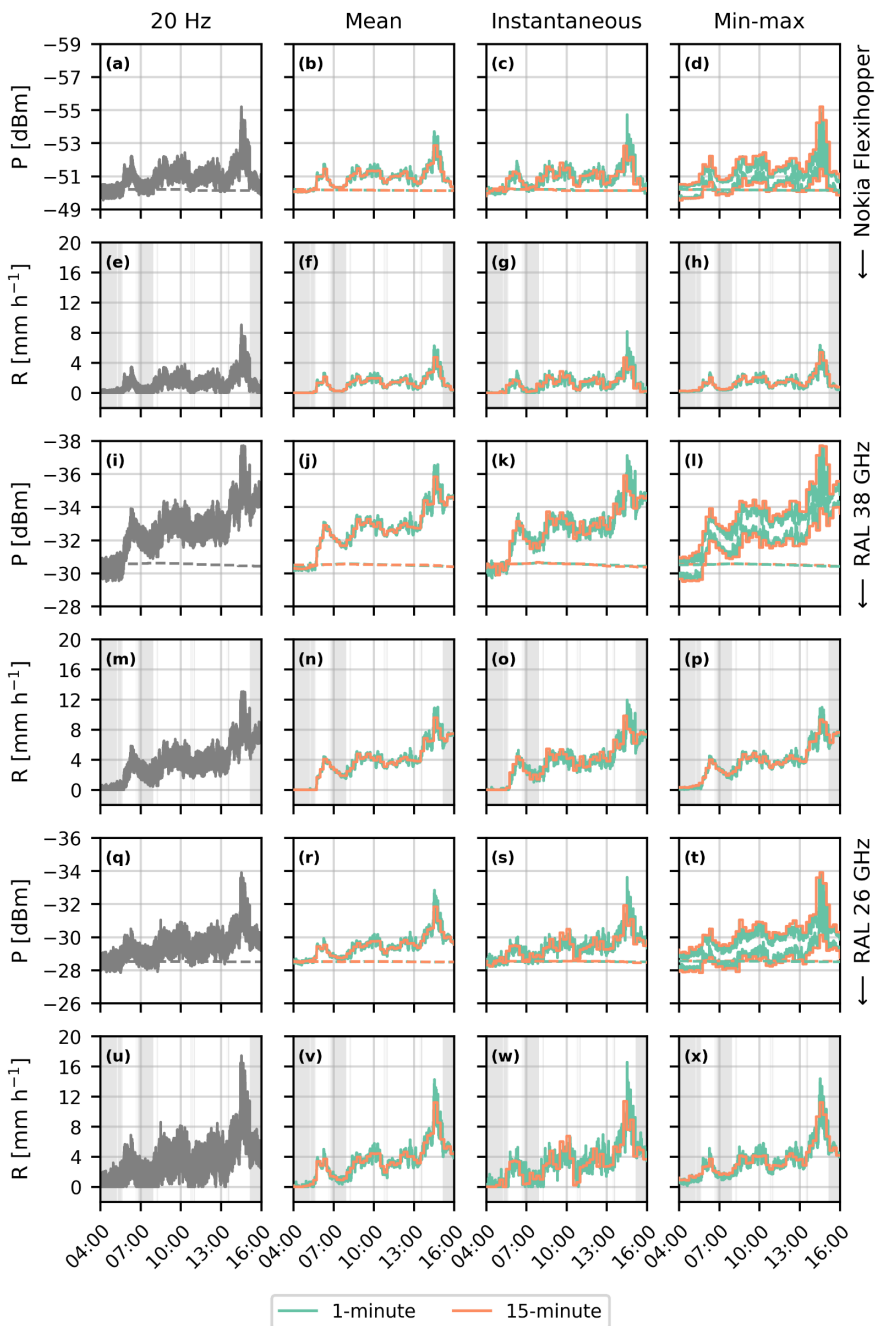

**Figure S5.** Comparison of received (solid) and baseline (dashed) power levels (a-d, i-l, q-t) and retrieved rainfall intensities (e-h, m-p, u-x) during a high-intensity precipitation event on 24 November 2015 obtained with the Nokia (a-h), RAL 38 GHz (i-p) and RAL 26 GHz (q-x) microwave links for all sampled variables and the 1-minute and 15-minute time intervals. Grey areas indicate dry periods based on disdrometer data.

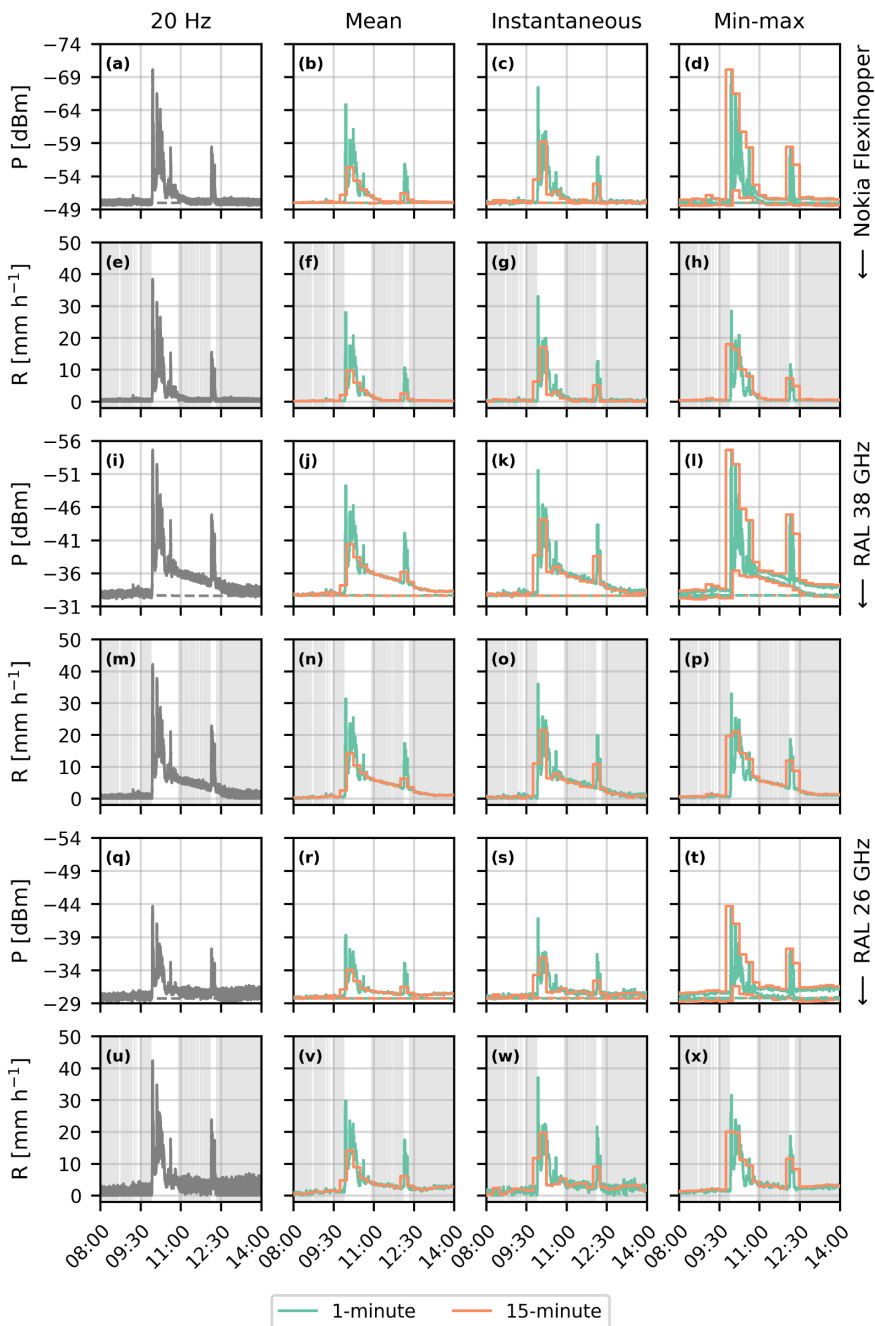

**Figure S6.** Comparison of received (solid) and baseline (dashed) power levels (a-d, i-l, q-t) and retrieved rainfall intensities (e-h, m-p, u-x) during a high-intensity precipitation event on 21 June 2015 obtained with the Nokia (a-h), RAL 38 GHz (i-p) and RAL 26 GHz (q-x) microwave links for all sampled variables and the 1-minute and 15-minute time intervals. Grey areas indicate dry periods based on disdrometer data.
